# Supplementary material
Source: PubMed Central journal article supplement (PMC7324198)
Supplement: jci-130-136908-s262.pdf [file jci-130-136908-s262.pdf]

# Supplemental information

## **IL-1 $\beta$ suppression of *VE-cadherin* transcription underlies sepsis-induced inflammatory lung injury**

Shiqin Xiong<sup>1</sup>, Zhigang Hong<sup>1</sup>, Long Shuang Huang<sup>1</sup>, Yoshikazu Tsukasaki<sup>1</sup>, Saroj Nepal<sup>1</sup>, Anke Di<sup>1</sup>, Ming Zhong<sup>1</sup>, Wei Wu<sup>1</sup>, Zhiming Ye<sup>2</sup>, Xiaopei Gao<sup>1</sup>, Gadiparthi N. Rao<sup>3</sup>, Dolly Mehta<sup>1</sup>, Jalees Rehman<sup>1</sup>, and Asrar B. Malik<sup>1#</sup>

<sup>1</sup>Department of Pharmacology and Regenerative Medicine and the Center for Lung and Vascular Biology, The University of Illinois College of Medicine, Chicago, IL 60612, USA

<sup>2</sup>Department of Nephrology, Guangdong Provincial People's Hospital, Guangdong Academy of Medical Sciences, Guangzhou, 510080, China.

<sup>3</sup>Department of Physiology, University of Tennessee Health Science Center, Memphis, TN 38163, USA

#Address correspondence to:

Asrar B. Malik, Ph.D  
Department of Pharmacology,  
The University of Illinois College of Medicine,  
835 South Wolcott Avenue, Chicago, IL, 60612.  
Phone: (312) 996-7635;  
Fax: (312) 996-1225;  
Email: abmalik@uic.edu

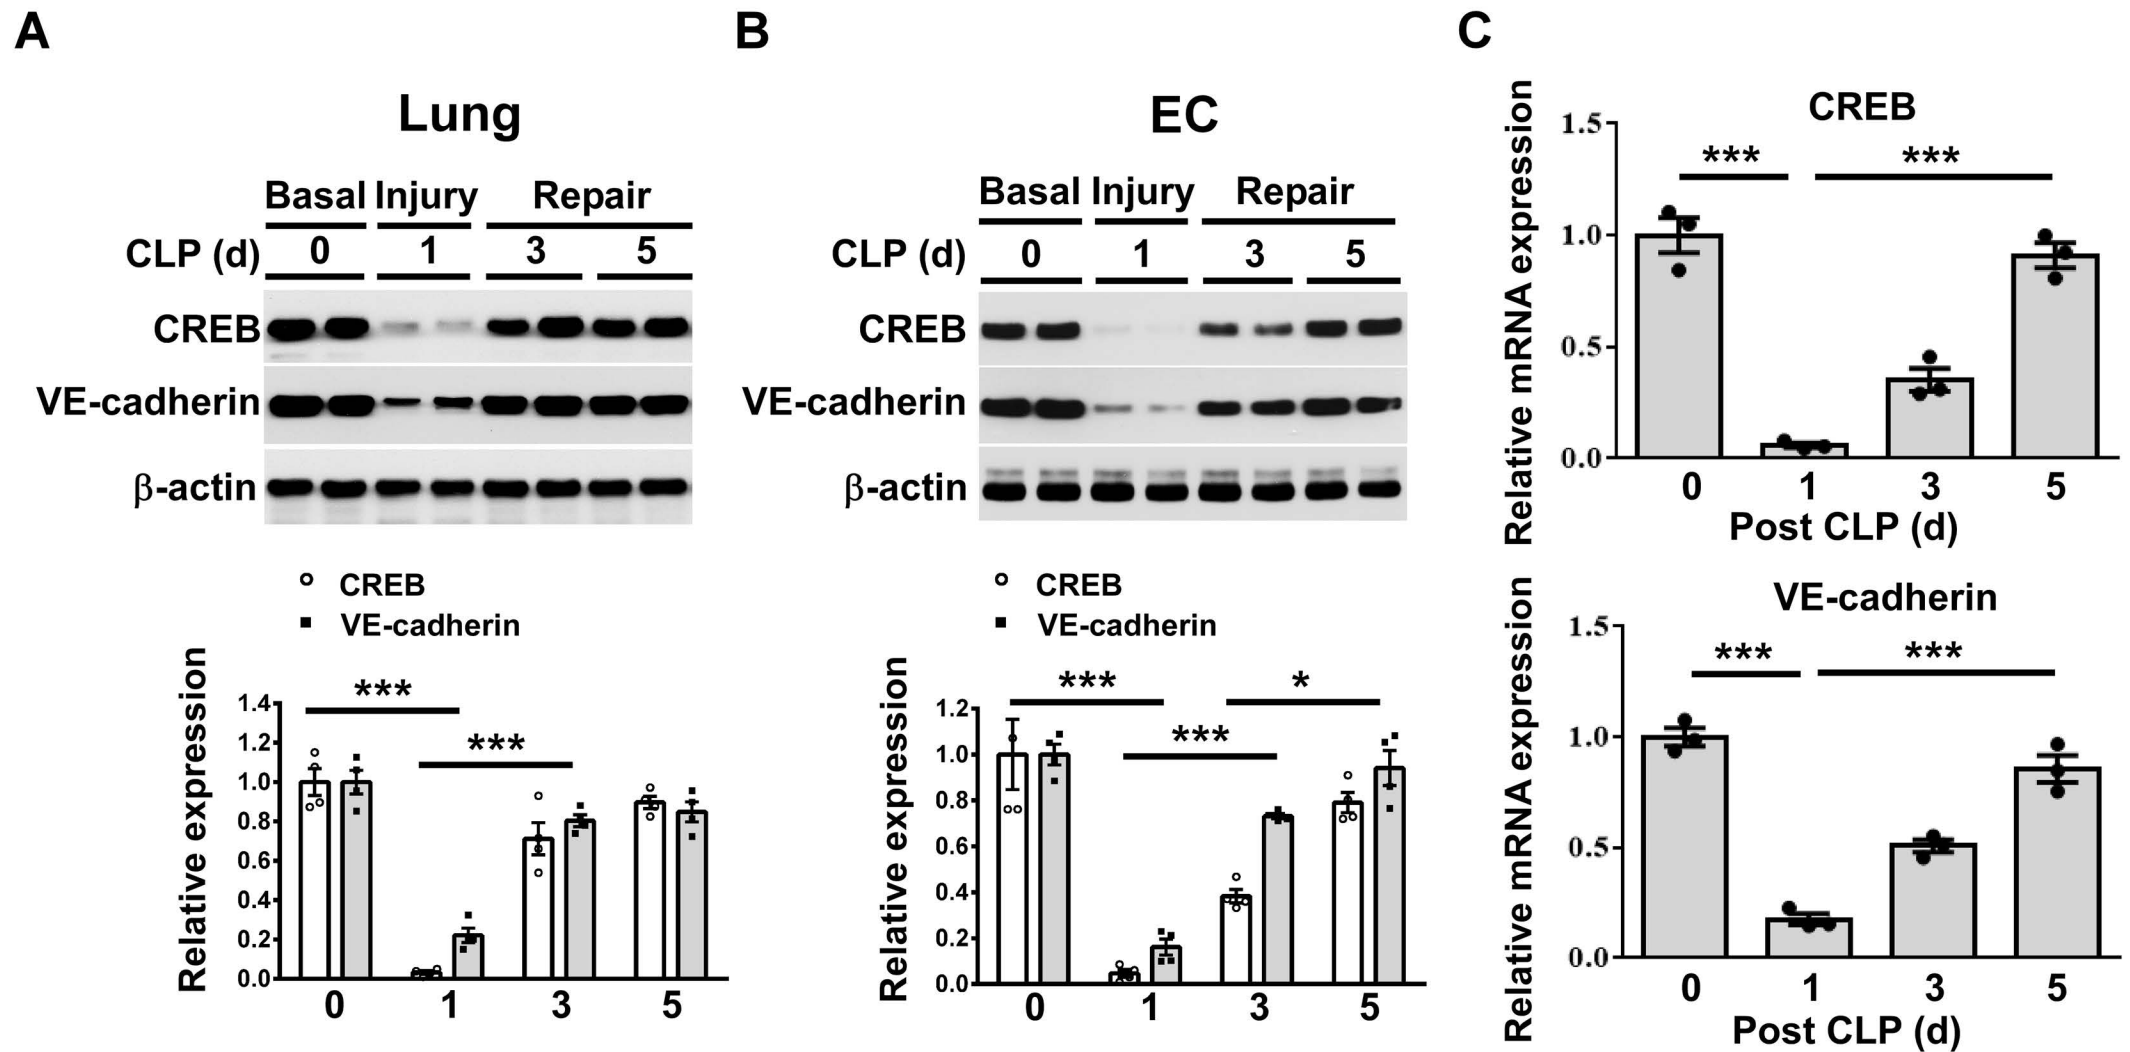

**Supplementary Figure 1. Downregulation of CREB-VE-cadherin signaling is involved in CLP-induced lung vascular injury.**

C57BL/6J mice (n=3) were subjected to cecal ligation and puncture (CLP) surgery for 1, 3, and 5 days. Protein expression was analyzed in whole lung lysates (A) and in fresh isolated endothelial cells (B) from mice underwent CLP surgery. (C) Real-time PCR detection of mRNA levels in fresh isolated endothelial cells was performed (n=3). Representative immunoblots and the bar graph quantification were shown. \* $P < 0.05$ , \*\* $P < 0.01$ , \*\*\* $P < 0.001$ .

## Promoter region of mouse *VE-cadherin* (NM\_009868, 784 aa), Chromosome 8.

## Promoter region of human *VE-cadherin* (NM\_001795, 784 aa), Chromosome 16.

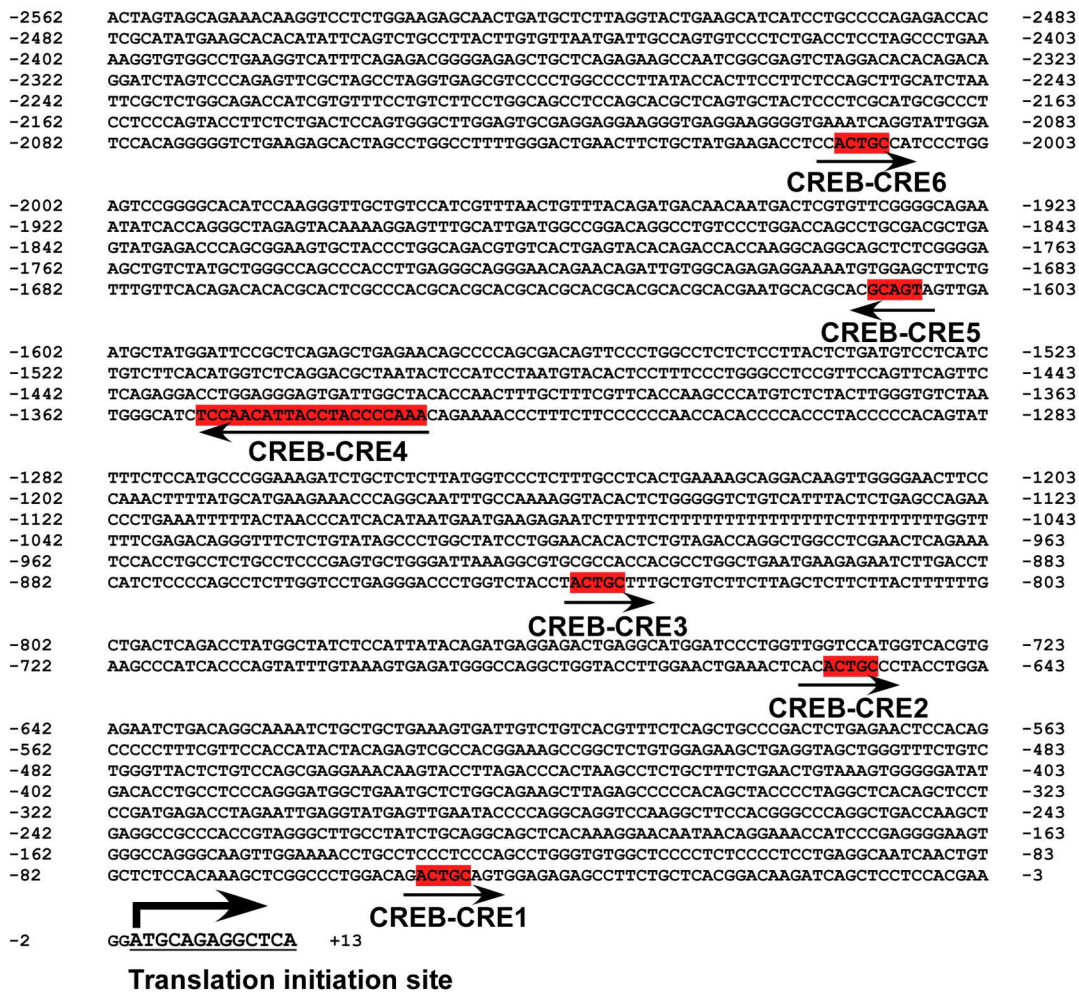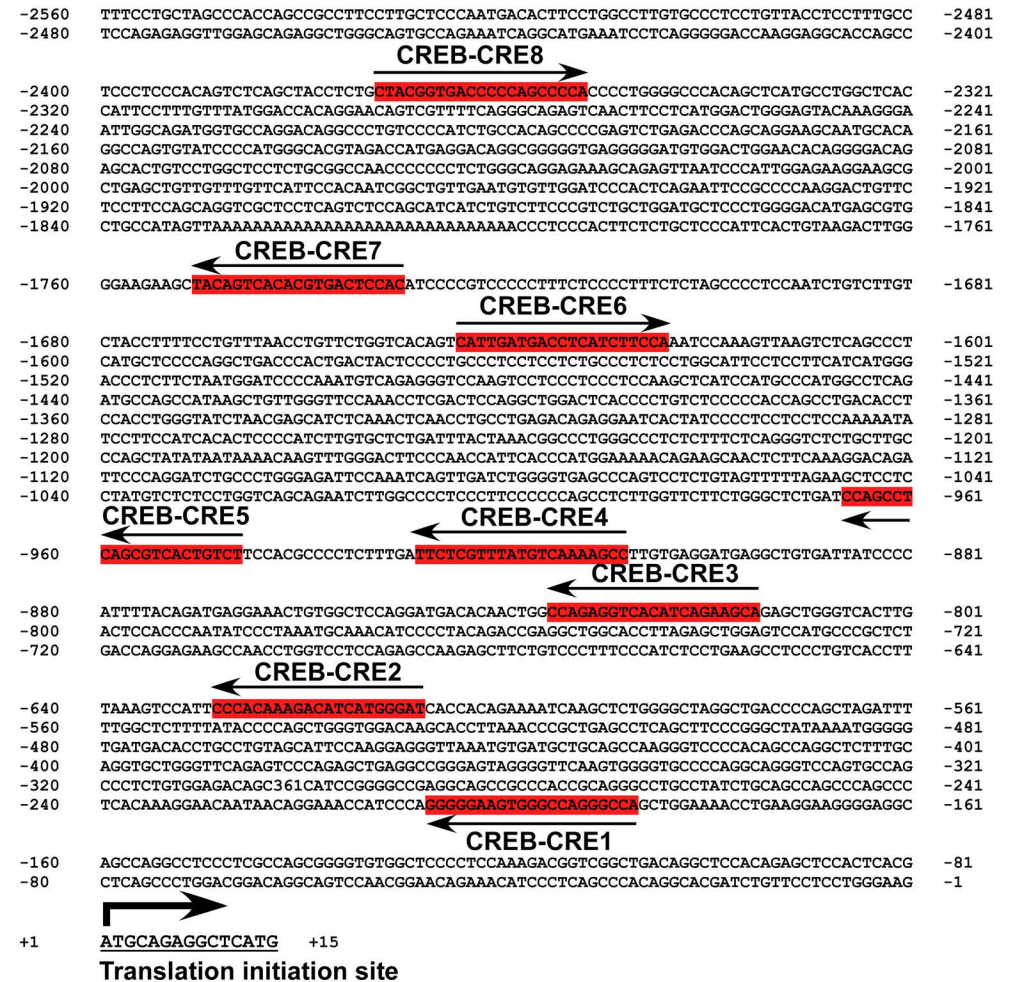

Supplemental Figure 2. Predicted CREB binding CREs within the mouse and human *VE-cadherin* promoter.

The 2.5 kb promoter region of the mouse and human *VE-cadherin* contains multiple highly conserved cyclic-AMP response elements (CREs).

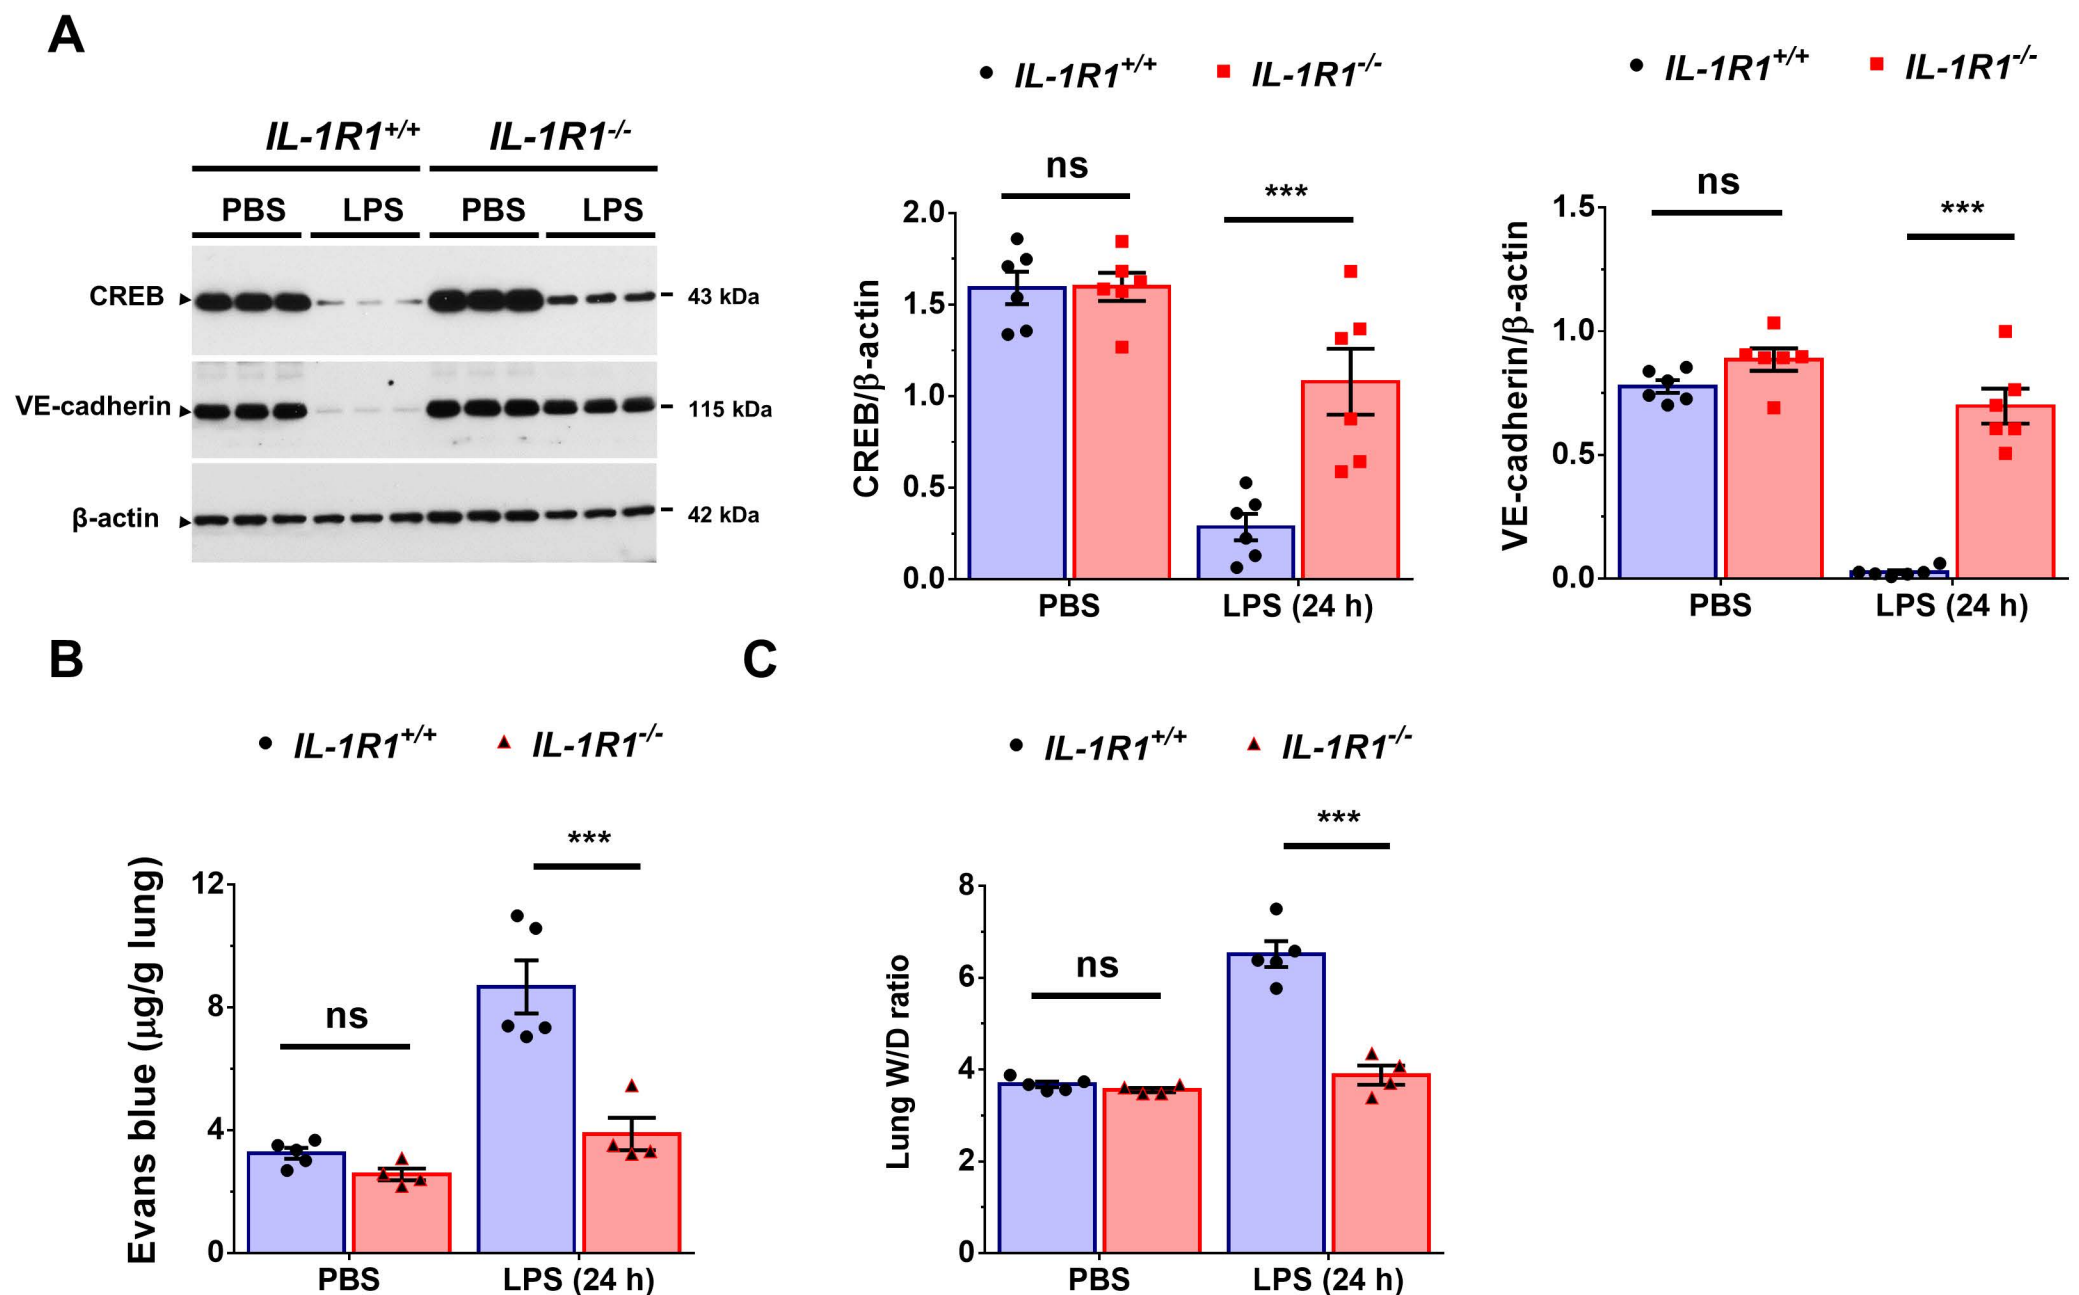

**Supplementary Figure 3. IL-1R1 is required for LPS-induced lung vascular leakage.**

(A) *IL-1R1*<sup>-/-</sup> and control mice (n=6) were challenged with LPS (12 mg/kg, i.p.) for 1 day. mLMVECs were freshly isolated using anti-CD31 and magnetic beads. Protein expression in endothelial cells was detected by Western blot using the indicated antibodies. Quantification of protein expression changes in mLMVECs was shown as the ratio of target protein to  $\beta$ -actin using Image J. \*\*\**P*<0.001; “ns”, no significant difference. (B and C) *IL-1R1*<sup>-/-</sup> and control mice were challenged with LPS (12 mg/kg, i.p.) for 1 day. (B) Lung vascular permeability is detected by Evans Blue dye leakage in the lungs. Extracted dye contents in the formamide extracts were quantified by measuring at 620 nm. (C) The ratio of the wet lung to dry lung weight was assessed. Results are shown as mean  $\pm$  SEM, n=4-5. \*\*\**P* < 0.001; ns, no significant difference. Statistics obtained from ANOVA.

**A**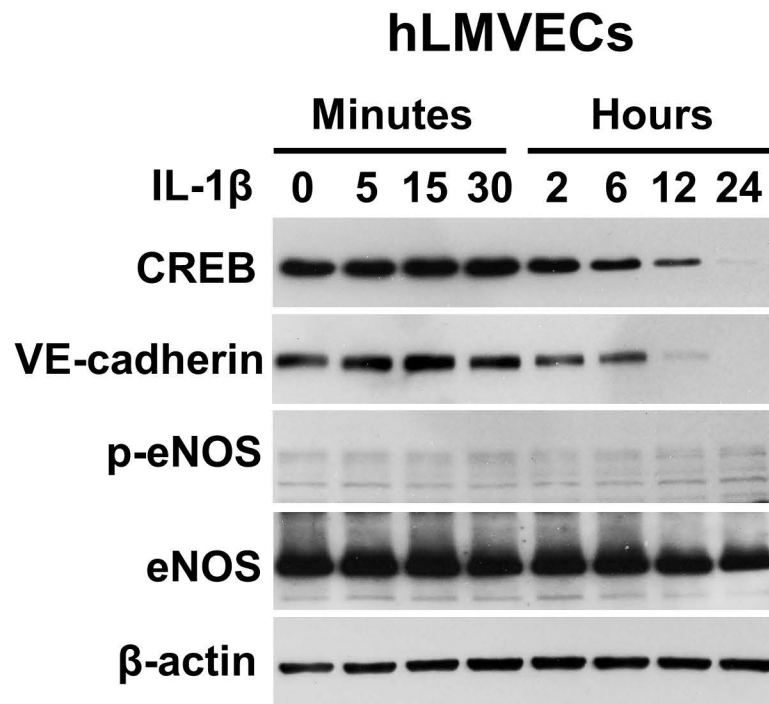**B**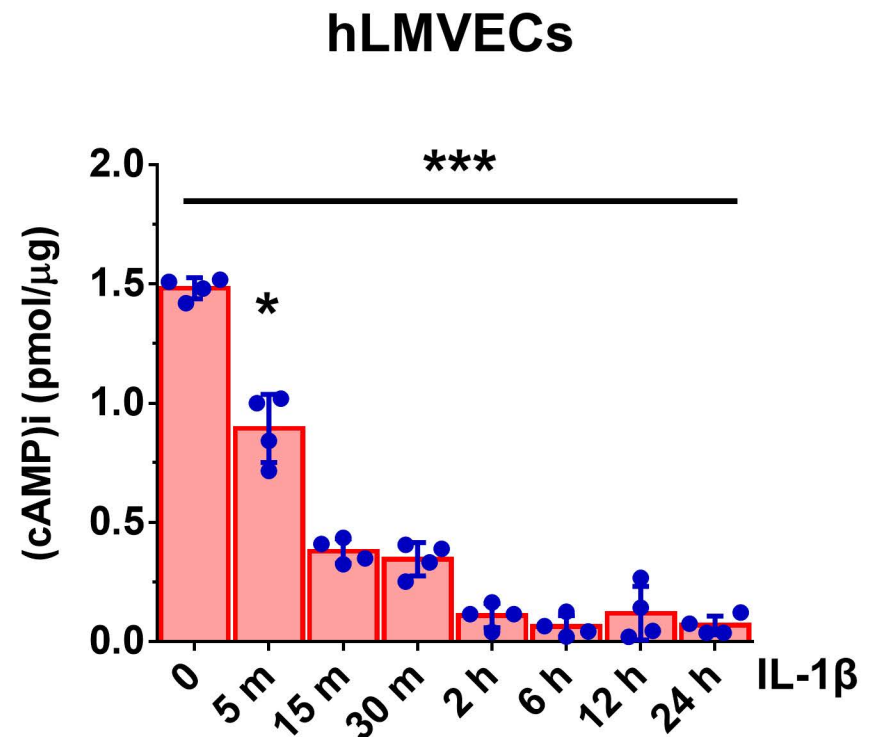

**Supplementary Figure 4. IL-1 $\beta$  decreases cAMP-CREB-VE-cadherin signaling in hLMVECs.**

hLMVECs were stimulated with IL-1 $\beta$  (5 ng/ml) over time. **(A)** Protein expression and phosphorylation were detected by Western blot using the indicated antibodies. **(B)** Intracellular cAMP levels were measured. Results are shown as mean  $\pm$  SEM, n=4. \* $P$ <0.05, \*\*\* $P$  < 0.001;

# Promoter region of mouse CREB1 (NM\_009952.2, 341 aa), Chromosome 1.

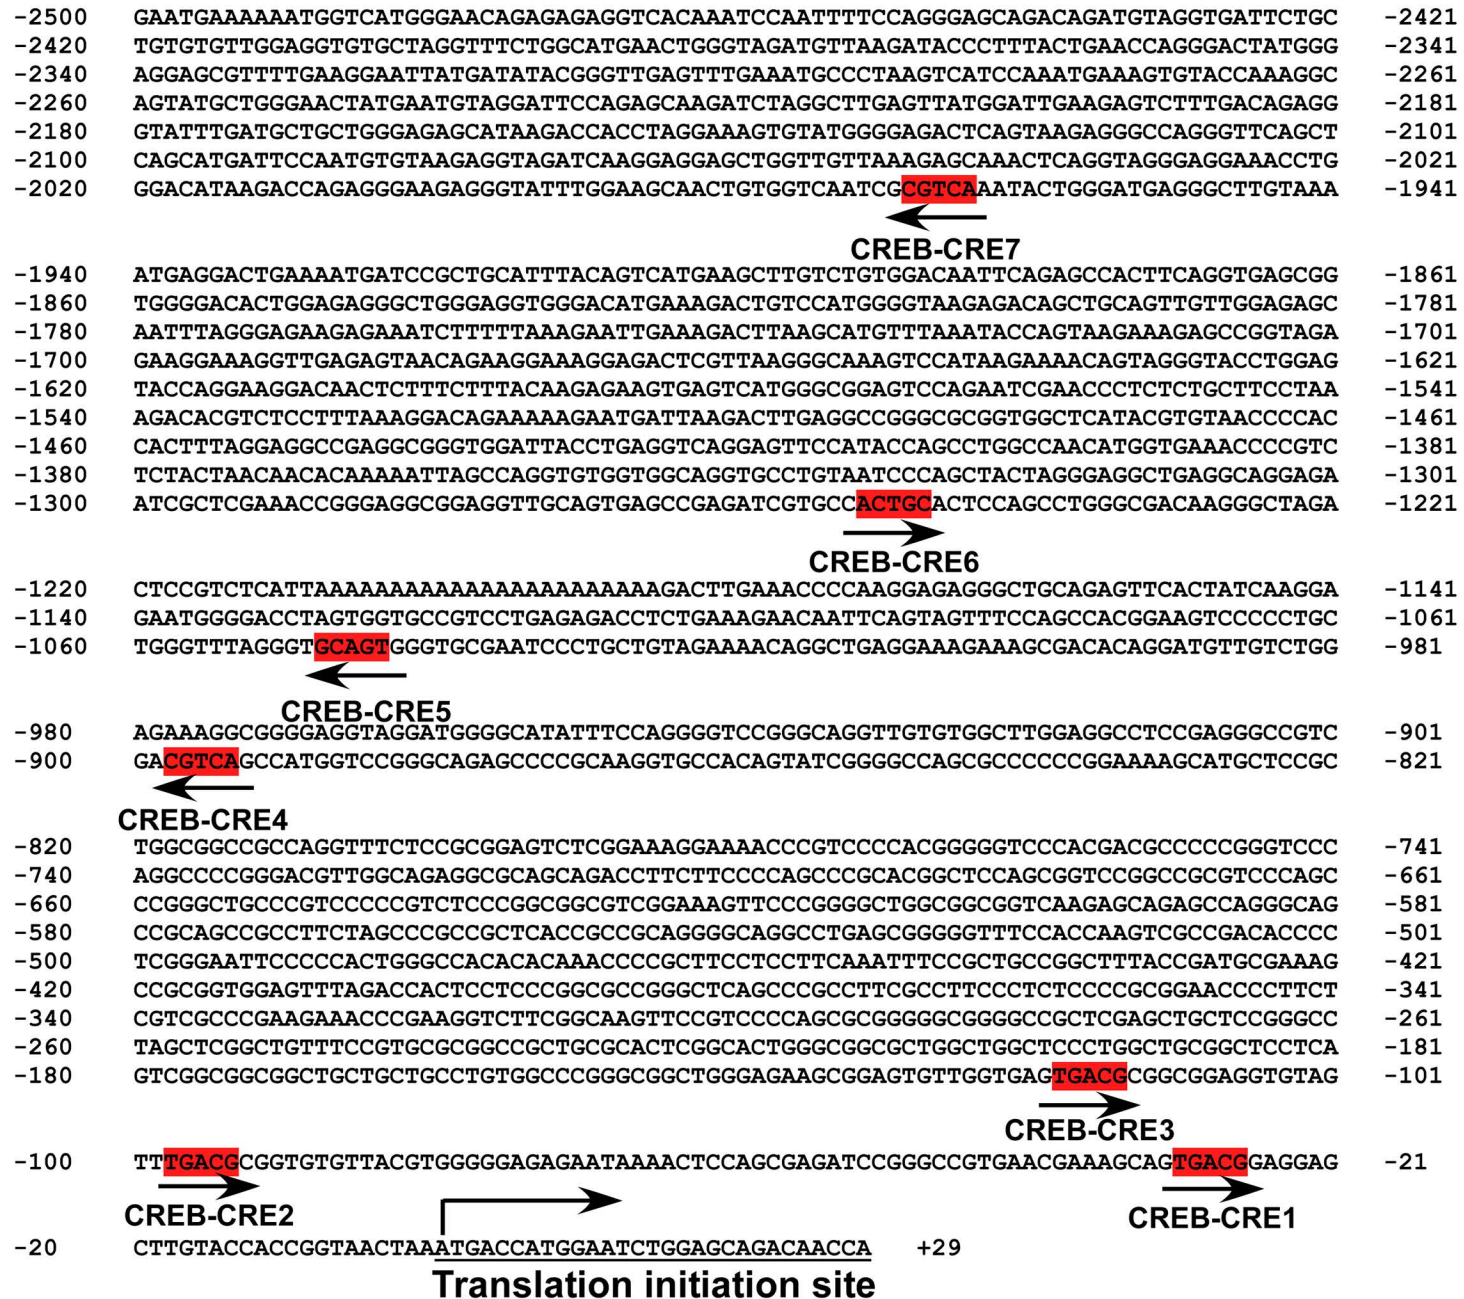

Supplementary Figure 5. Predicted CREB binding CREs within the mouse CREB promoter. The 2.5 kb promoter region of the mouse CREB gene itself contains multiple highly conserved cyclic-AMP response elements (CREs).

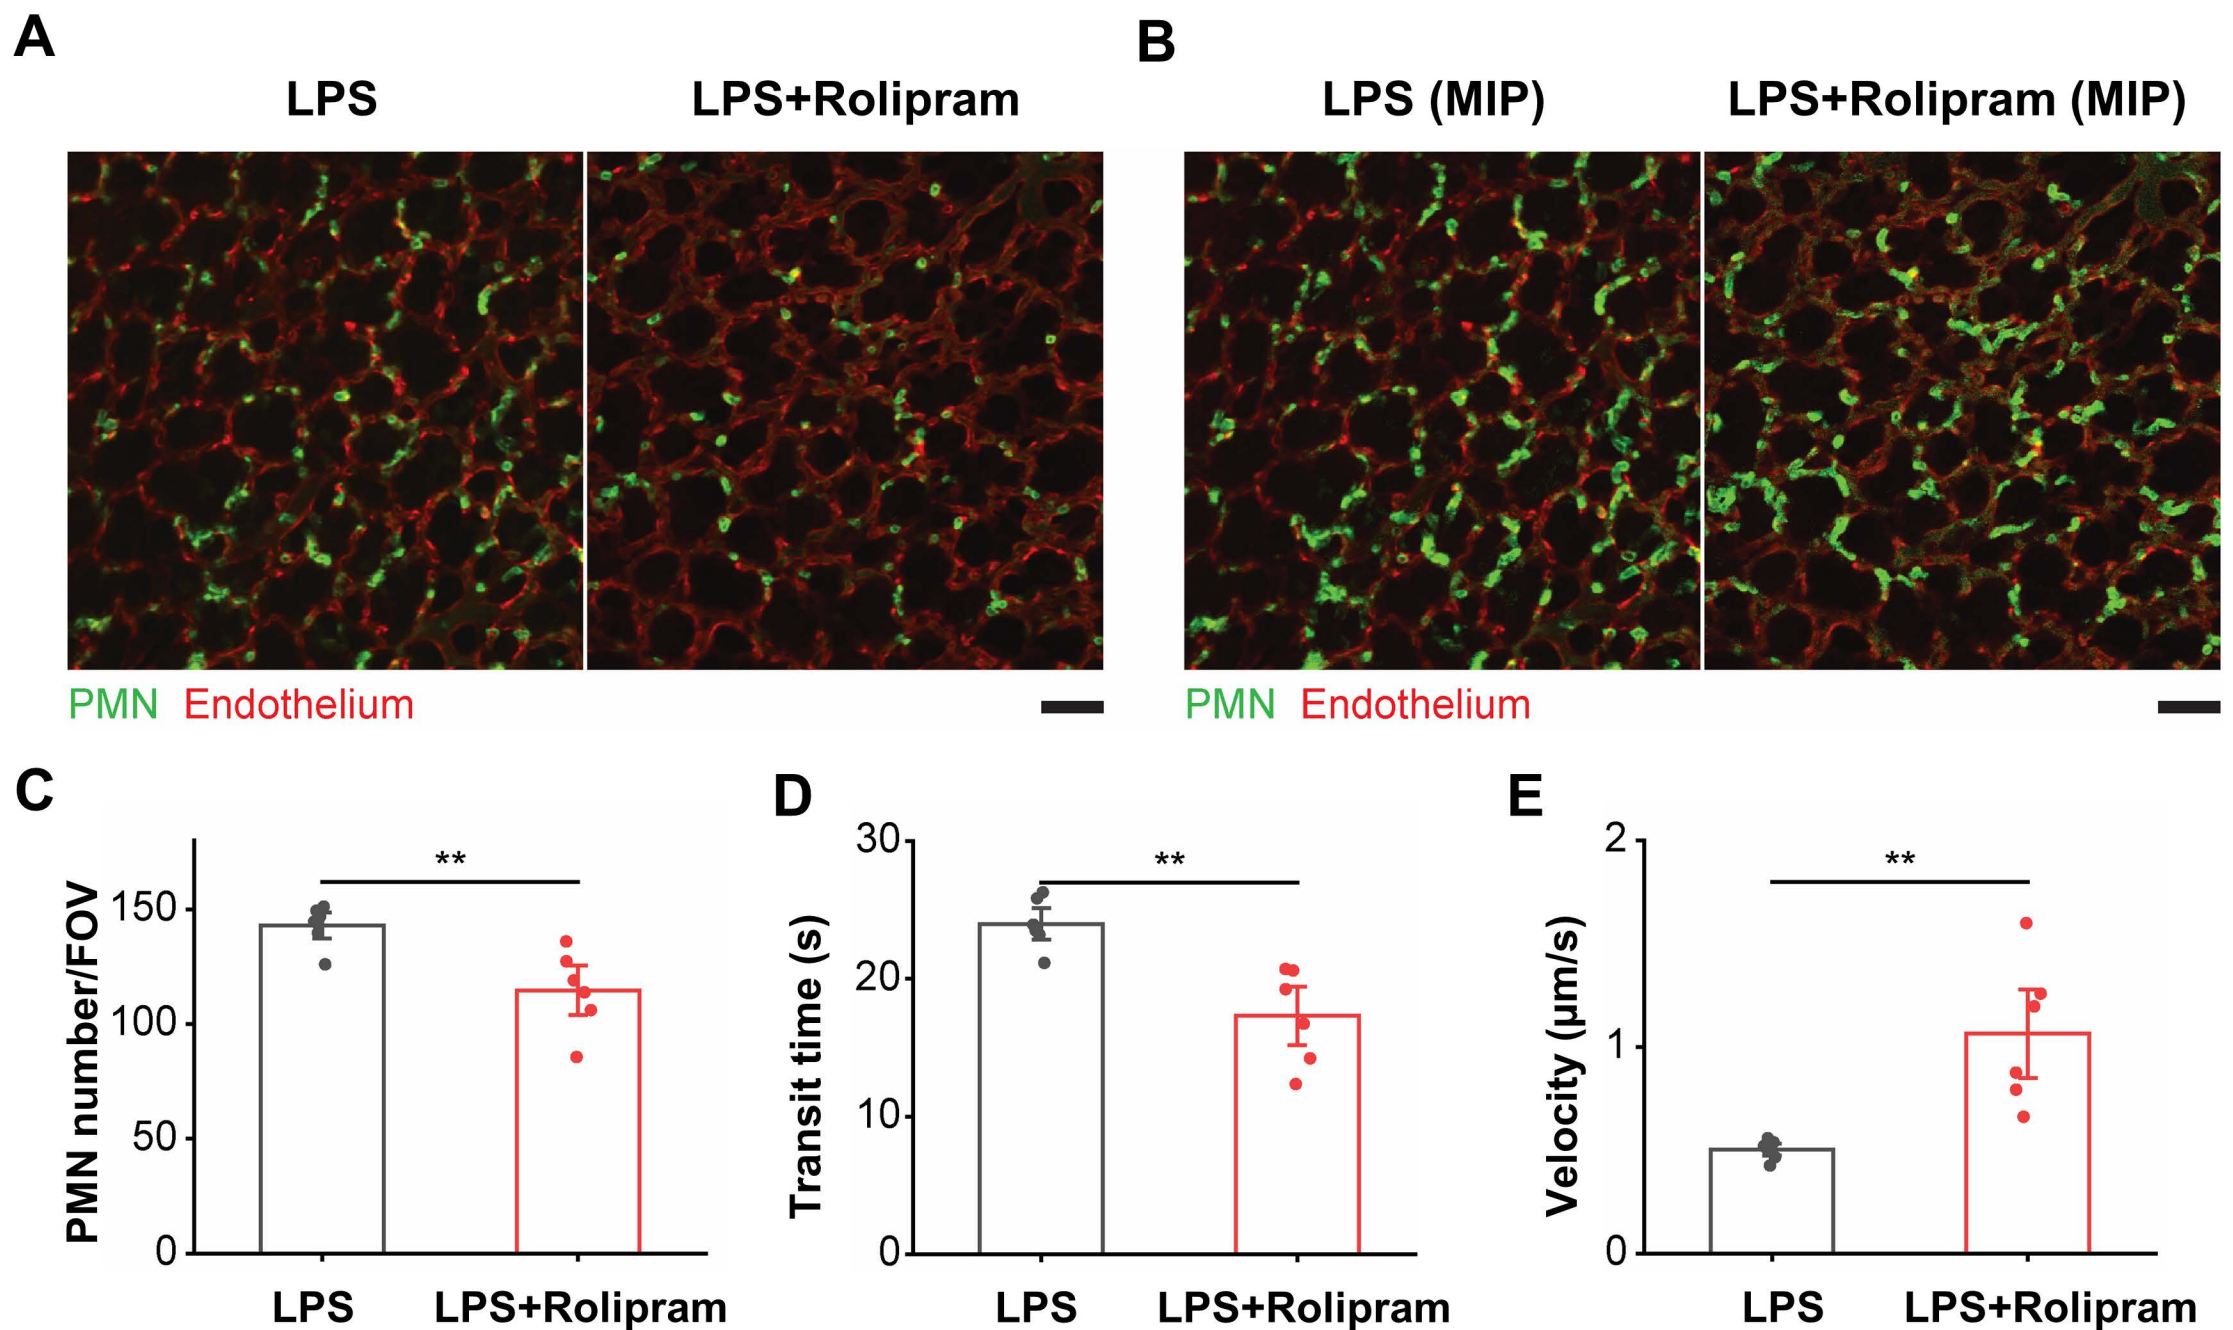

**Supplementary Figure 6. Augmentation of cAMP signaling by rolipram alters the dynamics of polymorphonuclear leukocytes (PMNs) through the lung.**

C57BL/6J mice were administrated with rolipram (5 mg/kg) for 1 hour, and injected intraperitoneally with LPS (12 mg/kg) for 1 day. Intravital lung imaging of PMNs and lung microvascular endothelium structures was analyzed. **(A)** Representative two-photon fluorescence images were shown (scale bar, 50 μm). **(B)** PMN trajectory was evaluated. The maximum intensity projection (MIP) images were presented (scale bar, 50 μm). **(C-E)** Quantitative analyses of PMN number **(C)**, transit **(D)** and velocity **(E)** were performed. FOV size is 500 x 500 μm. n=6, \*\*P<0.01.

**A**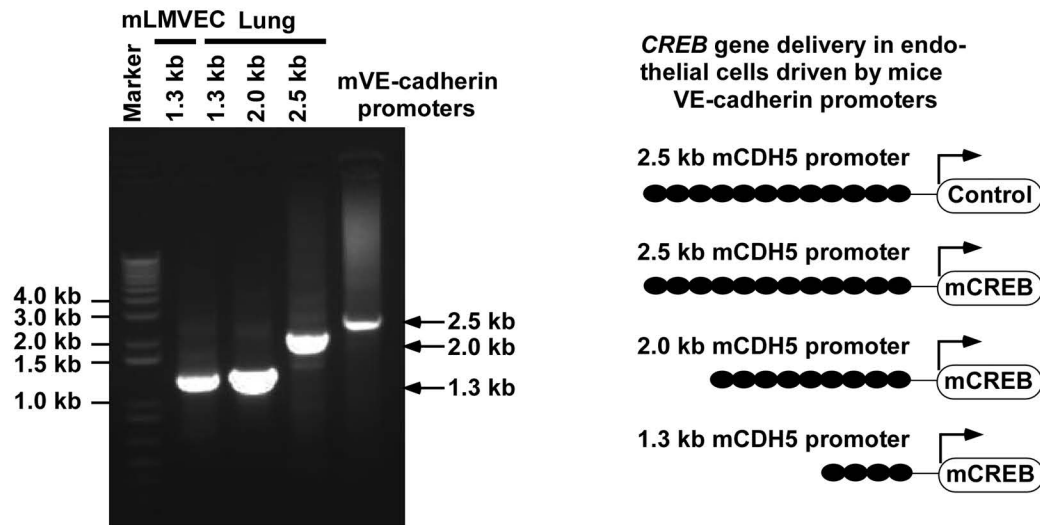**B**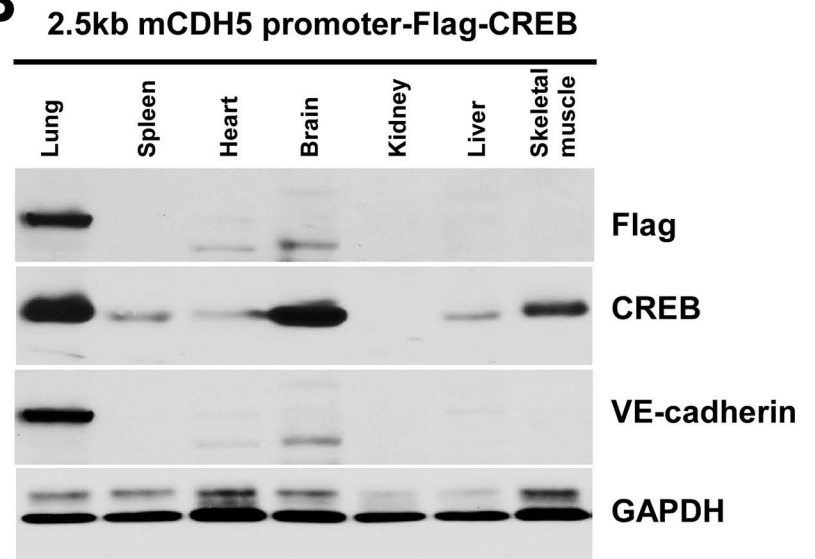**C**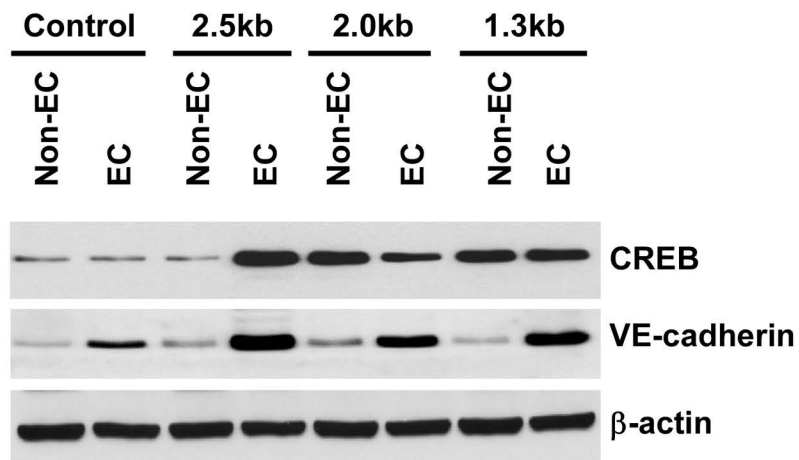**D**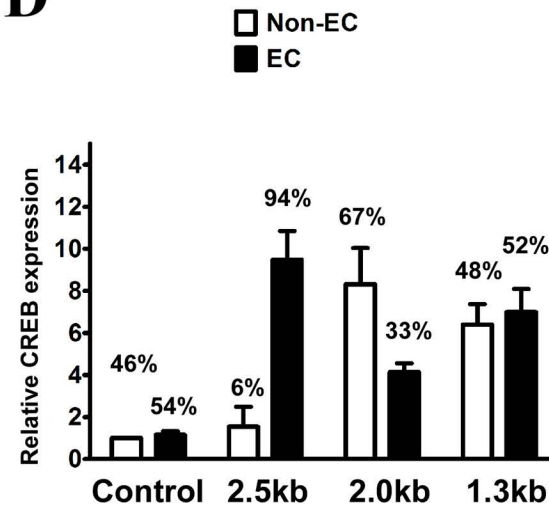**E**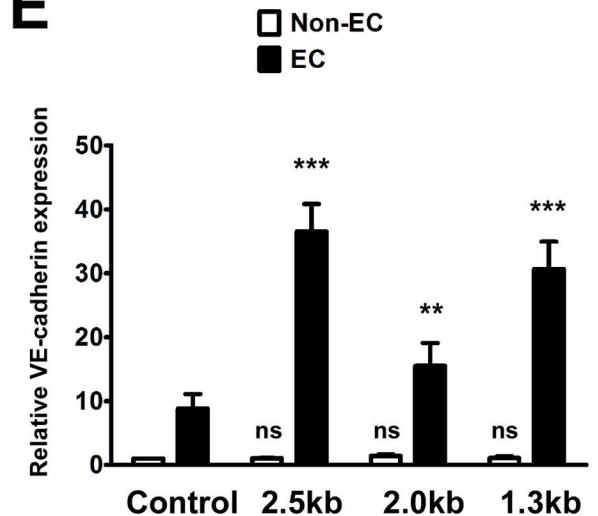

**Supplementary Figure 7. Endothelial CREB directly regulates expression of VE-cadherin *In Vivo*.** (A) Identification of the central *VE-cadherin* promoter regions enabling endothelial specific expression of CREB. Various fragments of mice *VE-cadherin* promoter regions were cloned and inserted into the upstream of *CREB* coding sequence. (B) The 2.5 kb-*VE-cadherin* promoter-directed CREB expression constructs were delivered into C57BL/6J mice by liposome-mediated retro-orbital injection for 7 days. Tissue expression distribution was assessed by Western blot. (C-E) CREB expression constructs driven by various fragments of *VE-cadherin* promoter were delivered into C57BL/6J mice for 7 days. Protein expression in endothelial cells and non-endothelial cells was analyzed by Western blot and quantified.  $n=3$ , \*\* $P<0.01$ ; \*\*\* $P<0.001$ , ns, no significant difference.



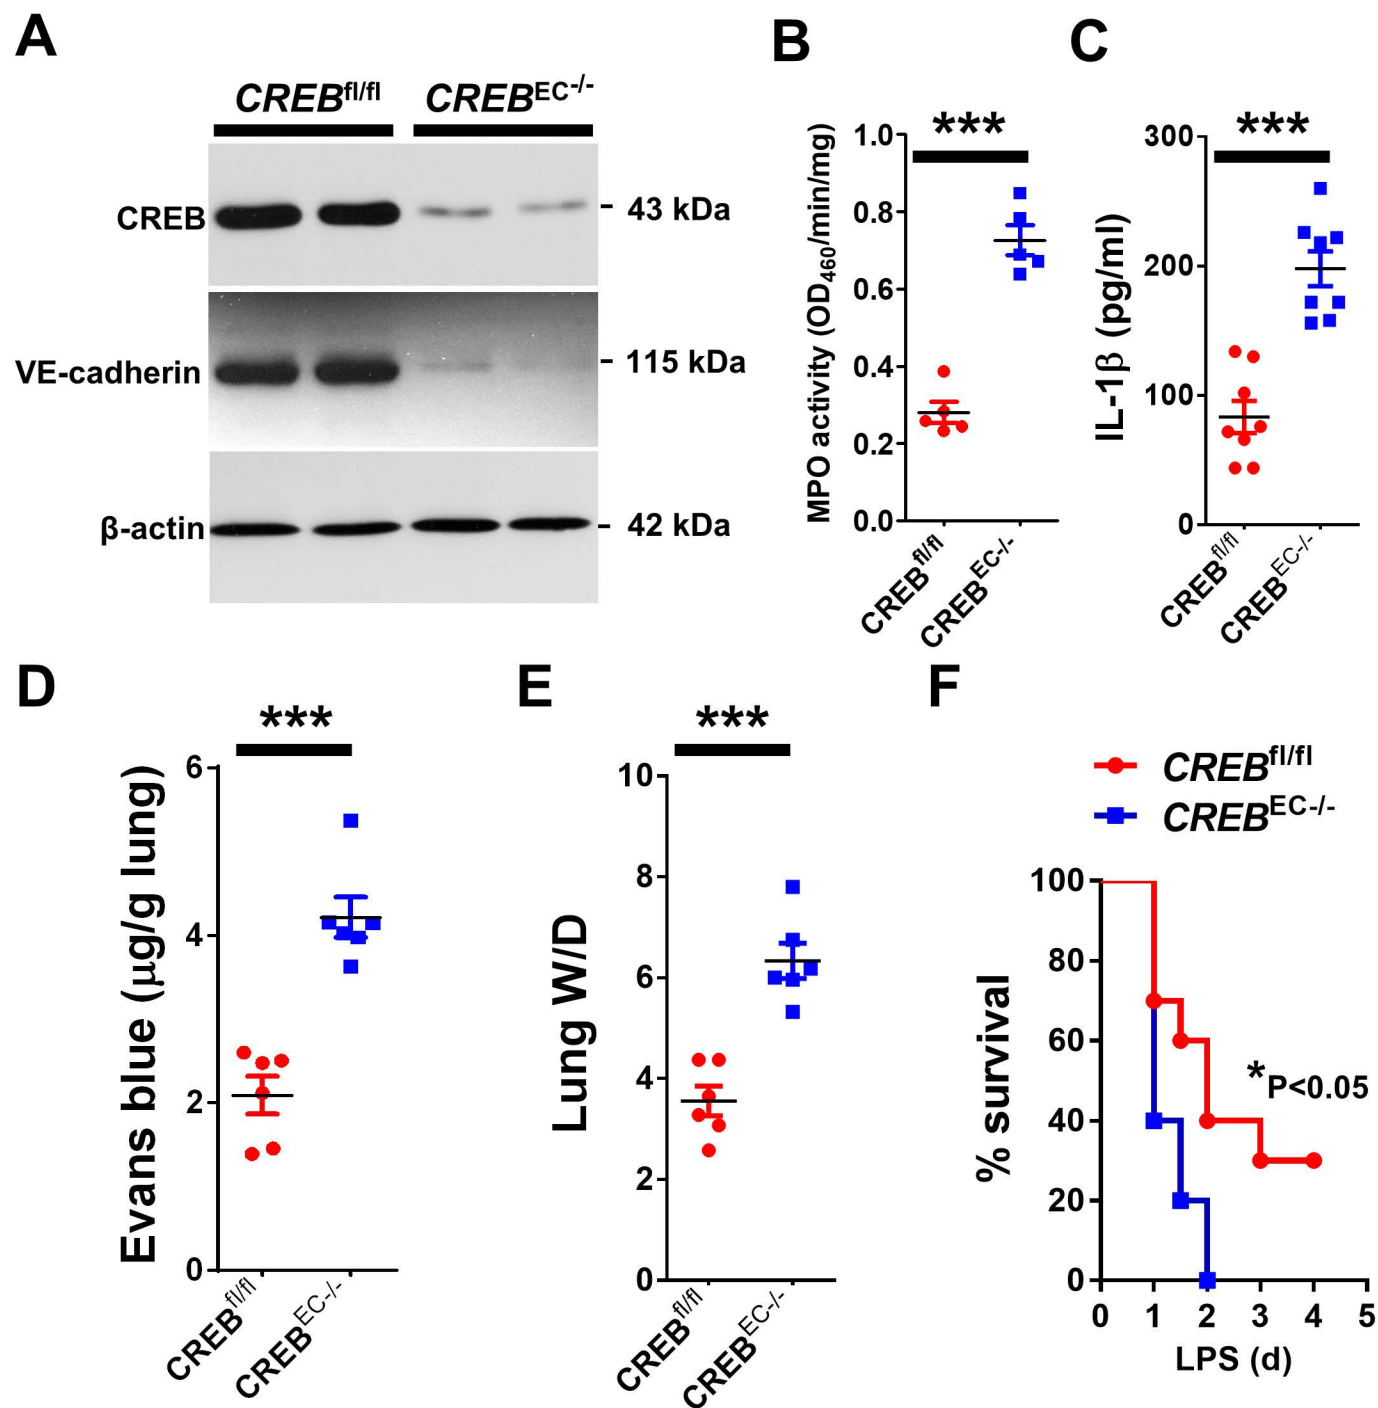

**Supplementary Figure 8. Loss of endothelial CREB develops lung inflammation and permeability.** (A) EC-specific *CREB* knockout mice were confirmed by Western blot using the indicated antibodies. (B) lung tissue MPO activity was measured (n=5). (C) Inflammatory cytokine levels of IL-1β in mice serum were measured by ELISA (n=8). (D) Lung vascular permeability is detected in lungs from *CREB<sup>fl/fl</sup>* and *CREB<sup>EC-/-</sup>* mice (n=6). (E) The ratio of the wet lung to dry lung weight was determined (n=6). (F) Survival of mice post 20 mg/kg LPS challenge was monitored and presented as a Kaplan-Meier plot. n=10. \*\*\**P*<0.001.

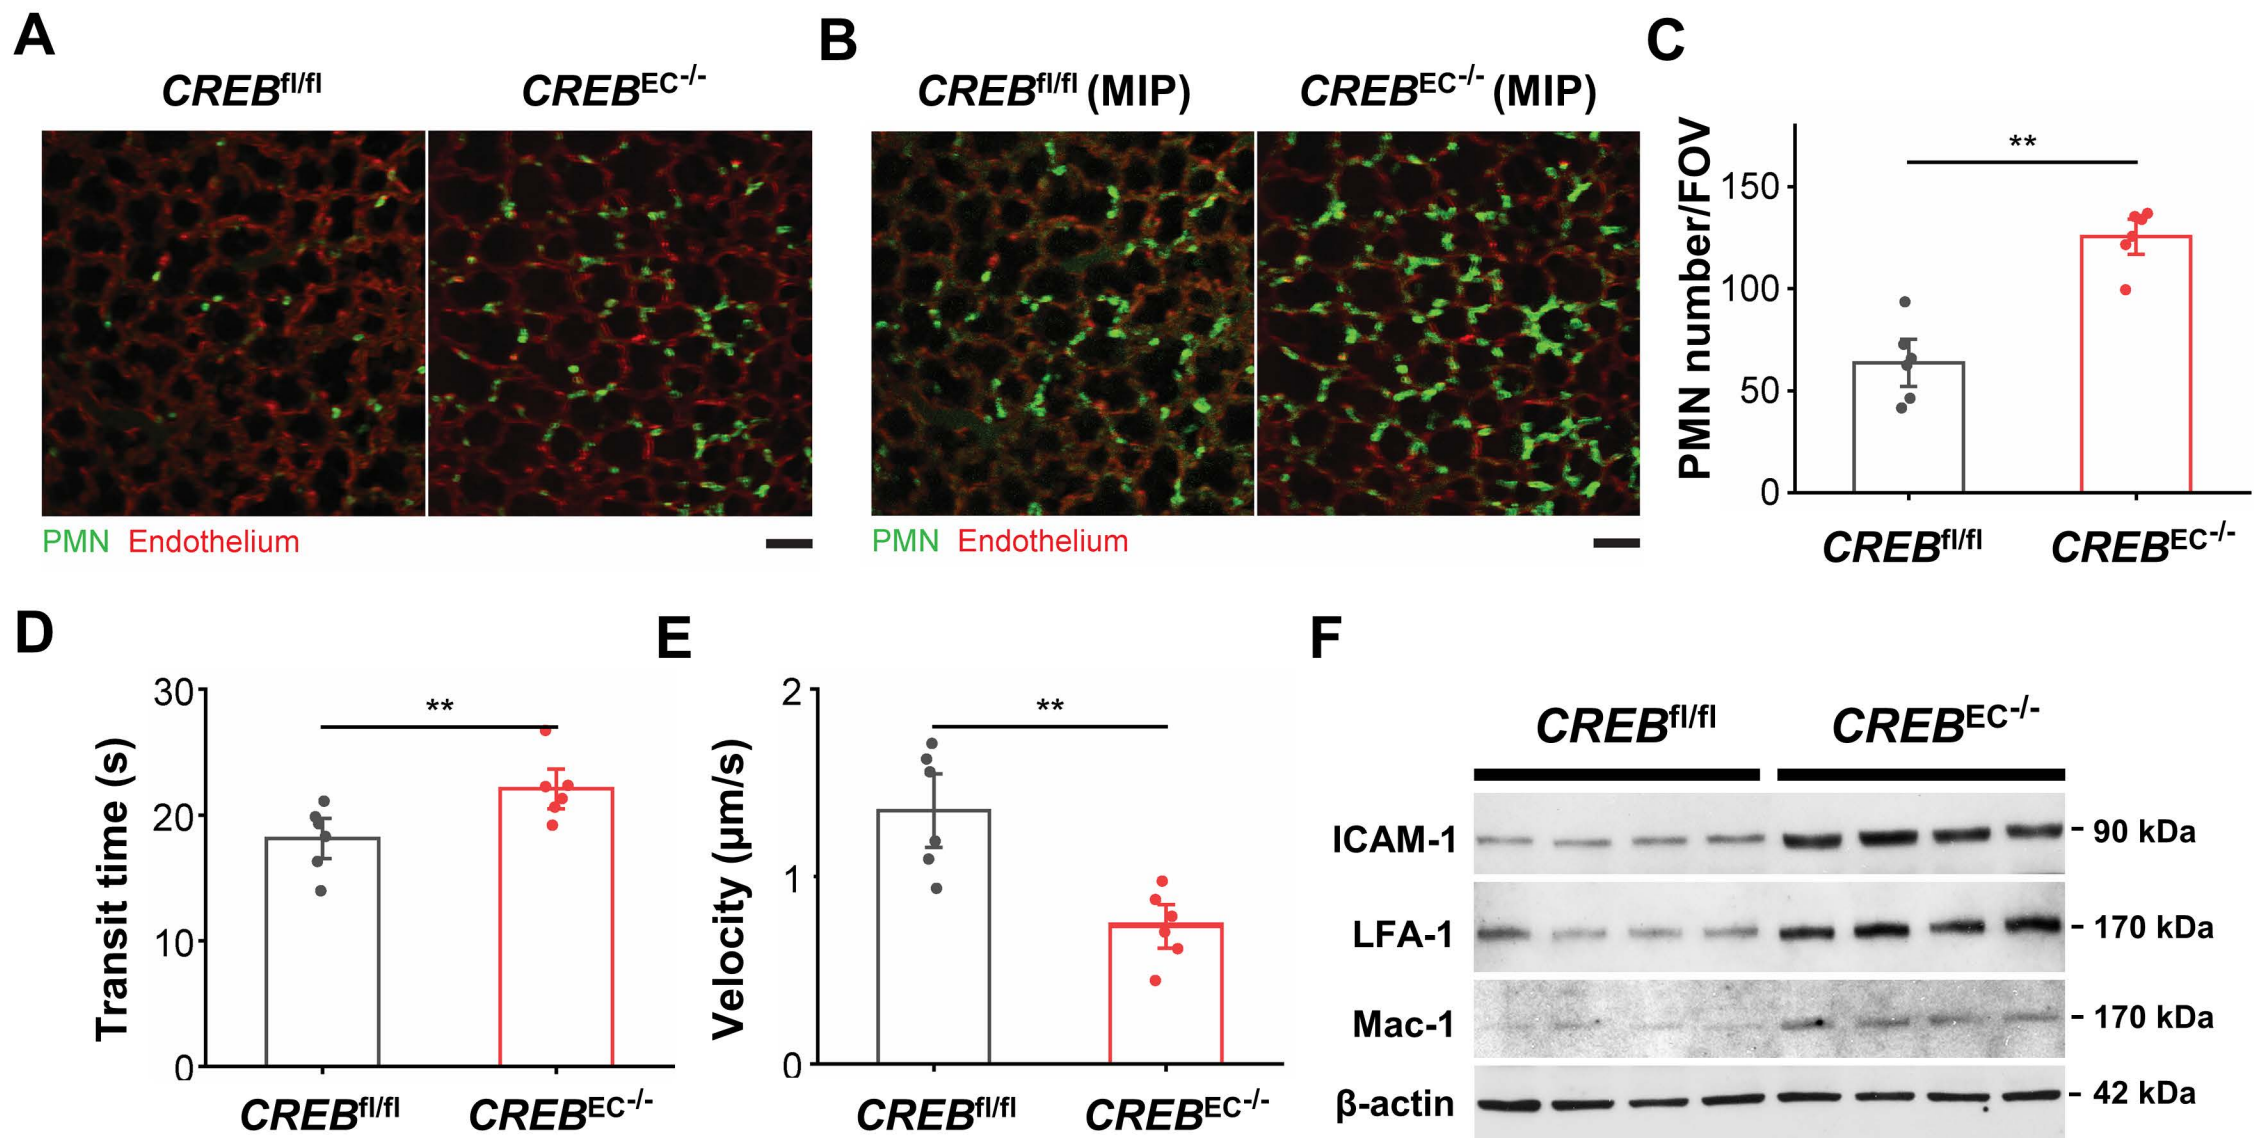

**Supplementary Figure 9. Loss of endothelial CREB promotes interaction of neutrophils with endothelial cells.** (A) Two-photon fluorescence images of PMNs and lung microvessel endothelium structure of *CREB*<sup>fl/fl</sup> and *CREB*<sup>EC-/-</sup> mice (scale bar, 50 μm). (B) PMN trajectory of *CREB*<sup>fl/fl</sup> and *CREB*<sup>EC-/-</sup> mice. The maximum intensity projection (MIP) images were presented (scale bar, 50 μm). (C-E) Quantitative analyses of PMN number (C), transit (D) and velocity (E) were performed. FOV size is 500 x 500 μm. n=6, \*\*P<0.01. (F) Lung lysates of *CREB*<sup>fl/fl</sup> and *CREB*<sup>EC-/-</sup> mice were prepared for expression detection of ICAM-1, LFA-1 and Mac-1 by Western blot.

**Table 1: Primers are used for quantitative real-time PCR and RT-PCR**

| Target gene            | GenBank <sup>TM</sup> accession # | Forward primers        | Reverse primers      | PCR product size (bps) |
|------------------------|-----------------------------------|------------------------|----------------------|------------------------|
| mCREB1                 | NM-001037726.1                    | CCAGGTCCATGGCGTTATCC   | ACTGCCCACTGCTAGTTTGG | 353                    |
| mVE-cadherin           | NM_009868                         | CAGGCCCTAACTTTCCCCAG   | CACAGTGGGGTCATCTGCAT | 473                    |
| mCTNNB1/<br>β-cadherin | NM_001165902.1                    | GTTCTACGCCATCACGACAC   | TTCAGCACTCTGCTTGTGGT | 279                    |
| mGAPDH                 | NM_001289726.1                    | CTCAGGAGAGTGTTTCCTCGTC | CTCGCTCCTGGAAGATGGTG | 268                    |

**Table 2: Primers are used for reporter assay for mice VE-cadherin transcription**

| Promoter fragments | Forward primers                   | Reverse primers                     |
|--------------------|-----------------------------------|-------------------------------------|
| 0.5 kb (-509/+18)  | ACTCGGAGCTCAGAAGCTGAGGTAGCTG      | CGATAACTCGAGCTCTGTGAGCCTCTGCAT      |
| 0.8 kb (-804/+18)  | ACTCGGAGCTCTGCTGACTCAGACCTATGGCTA | CGATAACTCGAGCTCTGTGAGCCTCTGCAT      |
| 1.0 kb (-1003/+18) | ACTCGGAGCTCTGGAACACACTCTGTAGACCA  | CGATAACTCGAGCTCTGTGAGCCTCTGCAT      |
| 1.5 kb (-1512/-24) | ACTCGGAGCTCATGGTCTCAGGACGCTAA     | CGACTA CTCGAGCGTGAGCAGAAGGCTCTCTCCA |
| 1.7 kb (-1762/-24) | ACTCGGAGCTCAGCTGTCTATGCTGGGCCAGC  | CGACTA CTCGAGCGTGAGCAGAAGGCTCTCTCCA |
| 2.0 kb (-1984/-24) | ACTCGGAGCTCAGGGTTGCTGTCCATCGTTTA  | CGACTA CTCGAGCGTGAGCAGAAGGCTCTCTCCA |
| 2.5 kb (-2482/-24) | ACTCGGAGCTCAAGCACACATATTCAG       | CGACTA CTCGAGCGTGAGCAGAAGGCTCTCTCCA |

**Supplementary Table 1 and 2| Sequences of primers for RT-PCR, Real-time PCR and Reporter assay.**

**Table 3: Primers are used for ChIP assay for mice VE-cadherin promoter**

| Promoter fragments             | Forward primers         | Reverse primers          |
|--------------------------------|-------------------------|--------------------------|
| VE-cadherin-CRE1 (-376/-5)     | GCTCTGGCAGAAGCTTAGAG    | CGTGGAGGAGCTGATCTTGT     |
| VE-cadherin-CRE2 (-803/-524)   | GCTGACTCAGACCTATGGCTATC | TCCGTGGCGACTCTGTAGTA     |
| VE-cadherin-CRE3 (-1138/-781)  | TACTCTGAGCCAGAACCCTGA   | GATAGCCATAGGTCTGAGTCAG   |
| VE-cadherin-CRE4 (-1465/-1259) | GGCCTCCGTTCCAGTTCAGTTC  | CAGATCTTCCGGGCATGGAGAA   |
| VE-cadherin-CRE5 (-1679/-1571) | GTTACAGACACACGCACTCG    | GCTGTTCTCAGCTCTGAGCGGAAT |
| VE-cadherin-CRE6 (-2077/-1902) | AGGGGGTCTGAAGAGCACTA    | GTA CTCTAGCCCTGGTGATAT   |

**Table 4: Primers are used for ChIP assay for mice CREB promoter**

| Promoter fragments        | Forward primers        | Reverse primers          |
|---------------------------|------------------------|--------------------------|
| mCREB1-CRE1 (-93/+29)     | CGGTGTGTTACGTGGGGGAG   | TGGTTGTCTGCTCCAGATTCC    |
| mCREB1-CRE2 (-32/-114)    | CGGCGGAGGTGTAGTTTGACG  | TTCGTTACGGCCCGGATCT      |
| mCREB1-CRE3 (-112/-339)   | GTCGCCCGAAGAAACCCGAA   | CCGCGTCACTACCAACACT      |
| mCREB1-CRE4 (-780/-1002)  | AGCGACACAGGATGTTGTCTGG | TTCCTTTCCGAGACTCCGCGGA   |
| mCREB1-CRE5 (-981/-1171)  | AGGAGAGGGCTGCAGAGTTC   | CCAGACAACATCCTGTGTGCTGCT |
| mCREB1-CRE6 (-1219/-1460) | CACTTTAGGAGGCCGAGGCG   | AGTCTAGCCCTTGTCGCCCA     |
| mCREB1-CRE7 (-1837/-2114) | GCCAGGGTTCAGCTCAGCAT   | TCCCAGCCCTCTCCAGTGTC     |

**Supplementary Table 3 and 4| Sequences of primers for ChIP assay for mice *VE-cadherin* and *CREB* promoter regions.**
